# Supplementary material for: Both degradation and AOX accumulation are significantly enhanced in UV/peroxymonosulfate/4-chlorophenol/Cl− system: two sides of the same coin?
Source: Royal Society of Chemistry journal article supplement (doi:10.1039/c7ra01294b), 2017-01-01
Supplement: c7ra01294b1.pdf [file c7ra01294b1.pdf]

## Electronic Supplementary Information

### **Both Degradation and AOX Accumulation Are Significantly Enhanced in UV/Peroxymonosulfate/4-Chlorophenol/Cl<sup>-</sup> System: Two Sides of the Same Coin?**

Zhaohui Wang<sup>a,b,\*</sup>, Min Feng<sup>a</sup>, Changling Fang<sup>a</sup>, Ying Huang<sup>a</sup>, Luoyan Ai<sup>a</sup>, Fei Yang<sup>a</sup>, Ying Xue<sup>a</sup>, Wenqian Liu<sup>a</sup>, Jianshe Liu<sup>a</sup>

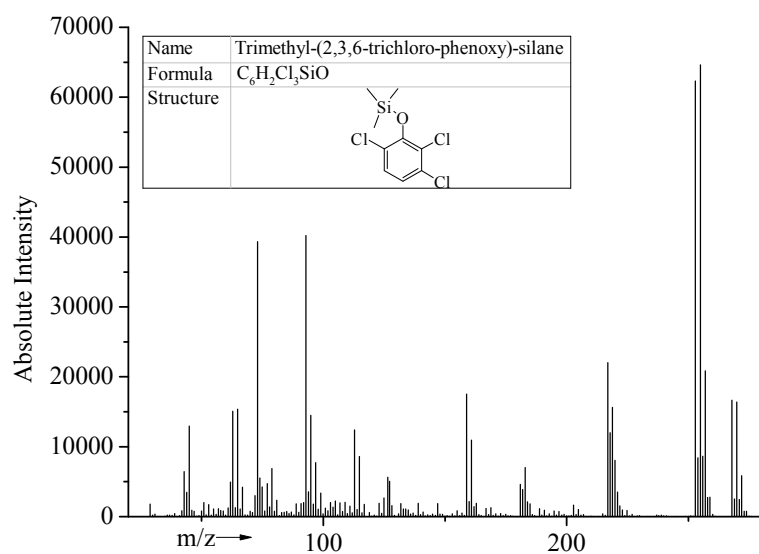

**Fig. S1** The MS spectrum of 4-CP corresponding to the 24.26 min peak on chromatograph at 15 min

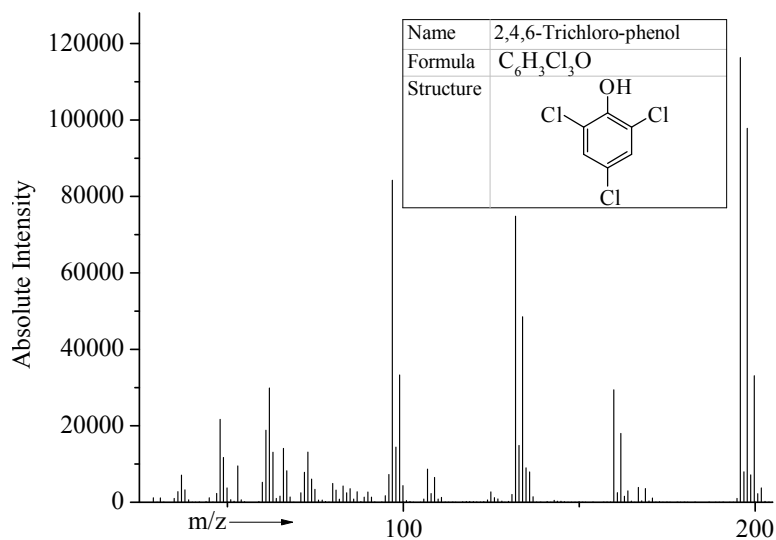

**Fig. S2** The MS spectrum of 4-CP corresponding to the 20.6 min peak on chromatograph at 15 min

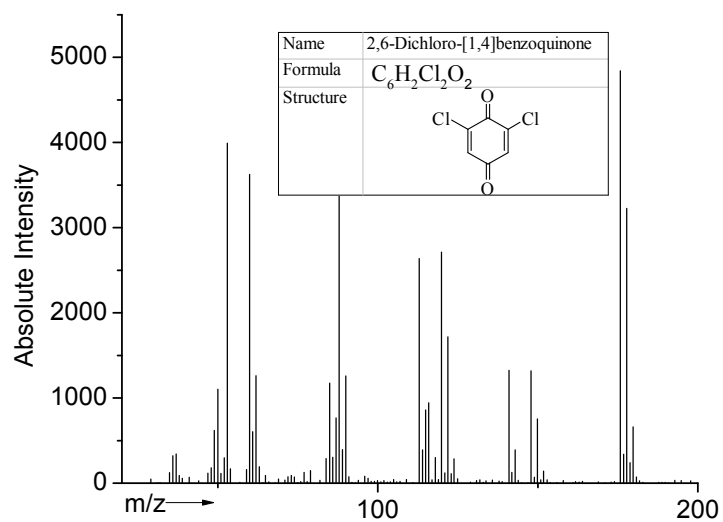

Fig. S3 The MS spectrum of 4-CP corresponding to the 16.085 min peak on chromatograph at 2 h

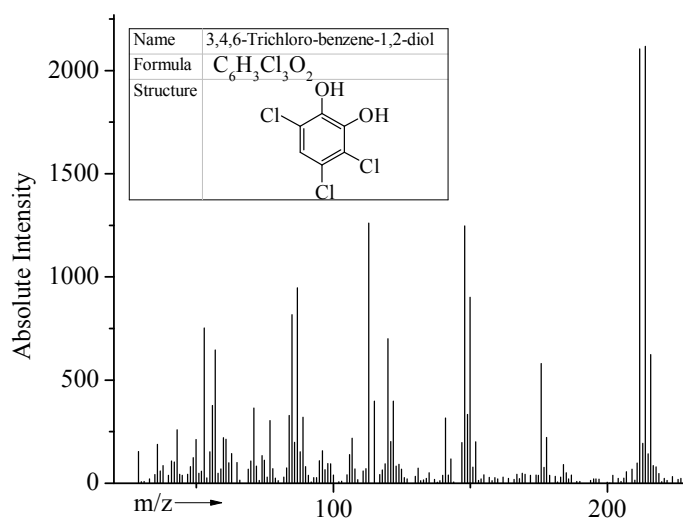

Fig. S4 The MS spectrum of 4-CP corresponding to the 29.3 min peak on chromatograph at 2 h

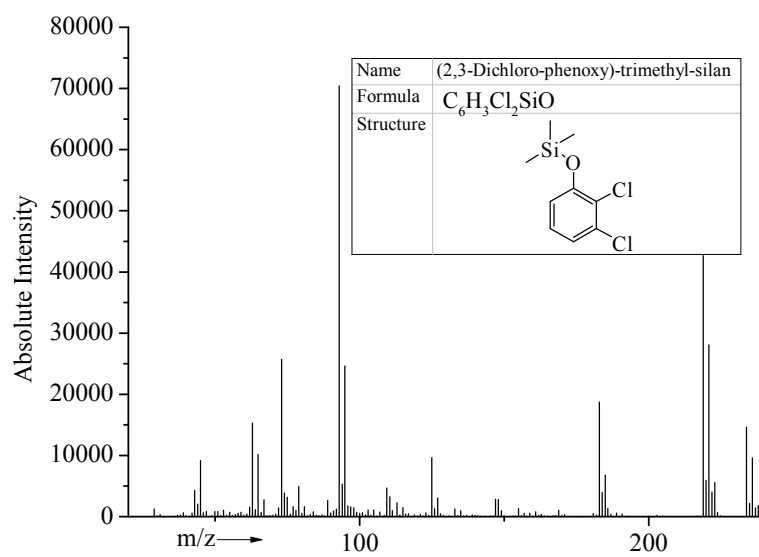

**Fig. S5** The MS spectrum of 4-CP corresponding to the 20.165 min peak on chromatograph at 15 min

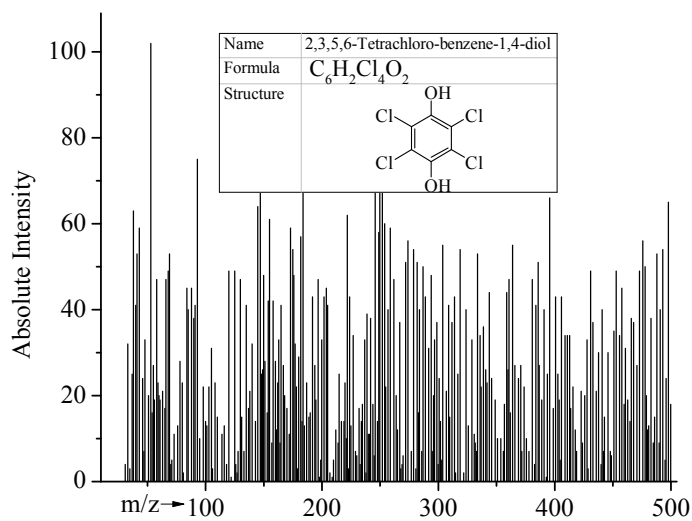

**Fig. S6** The MS spectrum of 4-CP corresponding to the 35.245 min peak on chromatograph at 2 h

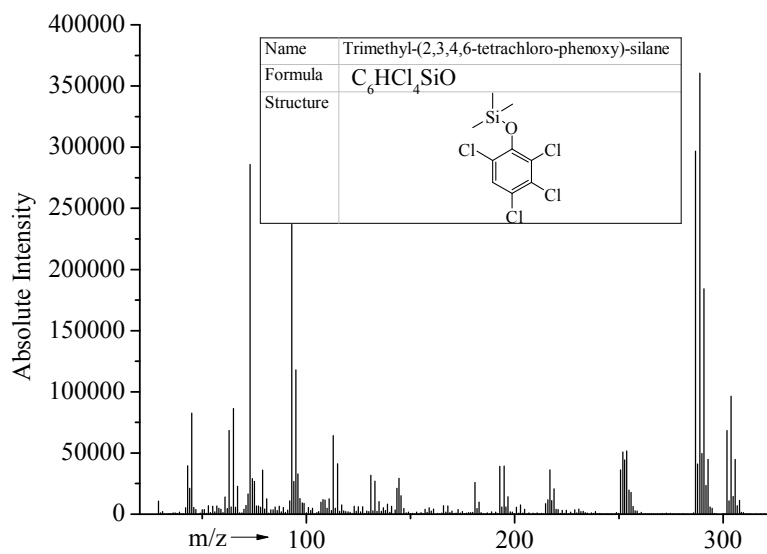

**Fig. S7** The MS spectrum of 4-CP corresponding to the 30.29 min peak on chromatograph at 15 min
